# Supplementary material for: Impact of the AYA HOPE Comorbidity Index on Assessing Health Care Service Needs and Health Status among Adolescents and Young Adults with Cancer
Source: Oxford University Press journal article supplement (doi:10.1158/1055-9965.epi-15-0401), 2015-09-29
Supplement: 10559965epi150401-sup-147723_2_supp_3148846_nkskck.docx [file 10559965epi150401-sup-147723_2_supp_3148846_nkskck.docx]

| AYA Comorbidity Index 2015 | |
| --- | --- |
| Supplementary Table S1: List of specific conditions in the AYA HOPE comorbidity index | |
|  |  |
| Comorbidity | **ICD-9 Code(s)** |
| Cardiovascular |  |
| *Ischemic Heart* | 412, 4149 |
| *Disease of Pericardium* | 4239 |
| *Valve Disorder* | 4240, H4240 |
| *Arrhythmias* | 7850, 7852, 42732, 42769 |
| *Congestive Heart Failure* | 4280 |
| *Blood Clots* | 4532, H41519 |
| *Peripheral Vascular Disease* | H44389 |
| *Lipid Disorder* | 2720, 2722, 2724, 2725 |
| *Pericarditis* | 42091 |
| *Cardiac Tamponade* | 4233 |
|  |  |
| Diabetes |  |
| *Diabetes mellitus, Type I* | 25001 |
| *Diabetes mellitus, Type II* | 25000, H25000 |
|  |  |
| Endocrine |  |
| *Thyroid Disorder* | 2449, 2459, 2469, 24290, 24690 |
| *Pituitary Disorder* | 2534, 2564 |
|  |  |
| Gastrointestinal |  |
| *Gallstones* | 57450 |
| *Esophagitis* | 53010 |
| *Gastric Ulcer* | 5789, 53020, 53150, 53340, 53390, V1271 |
| *Gastritis/Colitis* | 5559, 5589, 53550, 56211 |
| *Irritable Bowel Disease* | 5641 |
| *Stenosis of Rectum/Anus* | 5692 |
| *Pancreatitis* | 5771 |
| *History of Fistula* | H7503 |
| *History of Digestive Congenital Disorder* | H7511 |
|  |  |
| HIV/AIDS |  |
| *HIV Infection* | 042, V08, HV08, H042 |
|  |  |
| Hypertension |  |
| *Hypertension* | 4019, H4019 |
|  |  |
| Liver |  |
| *Hepatitis B* | 07030 |
| *Hepatitis C* | 07070, H07070 |
| *Non-alcoholic Cirrhosis* | 5715 |
| *Non-alcoholic Liver Disease* | 5718, 5719 |
|  |  |
| Mental Health |  |
| *Mood Disorder* | 3004, 3009, 3090, 29590, 29680, 29690, 30001, 30924 |
| *Depressive Disorder* | 311, H311, 29620 |
| *Anxiety Disorder* | 30000, 30002, H30000 |
| *Attention Deficit Disorder* | 31400, 31401, H31400 |
| *Mental Disability* | H319 |
|  |  |
| Neurological |  |
| *Cerebrovascular/Stroke* | 431, H43491 |
| *Chronic Pain* | 3384 |
| *Headaches* | 7840, 33900, 36490, H7840, H34690 |
| *Multiple Sclerosis* | 3400 |
| *Cerebral Palsy* | 3439 |
| *Epilepsy* | 34590, H34590, H78039 |
| *Neuropathy* | 3569, 7820 |
| *Eye Issues* | 3682, 36217, 37730 |
| *Congenital Neurological Deficit* | 74190 |
| *Syncope* | 7802, 7804 |
| *Compression of Brain* | 3484 |
| *Cranial Nerve Issue* | 3510, 78194 |
| *Extremity Issue* | 3540, 7234, 7197, H3540 |
| *Developmental Delay* | 3159, 31539 |
| *Altered Mental State* | 78097 |
|  |  |
| Obesity/Overweight |  |
| *Overweight/Obese* | 27800, 27801, 27802 |
|  |  |
| Renal |  |
| *Renal Disease* | 586, H5856 |
| *Kidney Transplant* | V420 |
| *Solitary Kidney* | V4573 |
|  |  |
| Ashma/Respiratory |  |
| *Asthma* | 49300, 49381, 49390, H49300, H49390 |
| *COPD* | 496 |
|  |  |
| Rheumatologic/Automimmune |  |
| *Rheumatoid Disease* | 7010, 71430, 71590 |
|  |  |
| Hematologic |  |
| *Hereditary Spherocytosi* | 2820 |
| *Sickle-cell Disease* | 28260 |
| *von Willebrand’s Disease* | 2864 |
| *Immune Thrombocyotpenic Purpura* | 28731 |
